# Supplementary material for: Antifungal and Antiaflatoxigenic Methylenedioxy-Containing Compounds and Piperine-Like Synthetic Compounds
Source: PubMed Central journal article supplement (PMC4999856; doi:10.3390/toxins8080240), 2016-08-16
Supplement: toxins-08-00240-s001.pdf [file toxins-08-00240-s001.pdf]

# Supplementary Materials: Antifungal and Antiaflatoxigenic Methyleneedioxy-Containing Compounds and Piperine-Like Synthetic Compounds

Young-Sun Moon, Won-Sik Choi, Eun-Sil Park, In Kyung Bae, Sung-Deuk Choi, Ockjin Paek, Sheen-Hee Kim, Hyang Sook Chun and Sung-Eun Lee

**Table S1.** All chemicals and their concentrations tested in this study

| Chemicals                                                             | Tested Concentrations (µg/mL) | Regard                                               |
|-----------------------------------------------------------------------|-------------------------------|------------------------------------------------------|
| thiabendazole                                                         | 10, 5, 1                      | Positive control, synthetic fungicide                |
| 1,3-benzodioxole                                                      | 1000, 100                     | Natural compound, Sigma-Aldrich                      |
| sesamol                                                               | 1000, 100                     | Natural compound, Sigma-Aldrich                      |
| eugenol                                                               | 1000, 100                     | Natural compound, Sigma-Aldrich                      |
| methyleugenol                                                         | 1000, 100                     | Natural compound, Sigma-Aldrich                      |
| Piperonal                                                             | 1000, 100                     | Natural compound, Sigma-Aldrich, Isolated in my lab. |
| piperine                                                              | 3000, 1000                    | Natural compound, Sigma-Aldrich, Isolated in my lab. |
| Asarone                                                               | 1000                          | Natural compound, Sigma-Aldrich                      |
| methylenedioxy aniline                                                | 1000                          | Natural compound, Sigma-Aldrich                      |
| methylenedioxy phenylacetic acid                                      | 1000, 100, 10                 | Natural compound, Sigma-Aldrich                      |
| methylenedioxycinnamic acid                                           | 1000, 100                     | Natural compound, Sigma-Aldrich                      |
| methylenedioxyphenyl propionic acid                                   | 1000, 100                     | Natural compound, Sigma-Aldrich                      |
| piperonyl alcohol                                                     | 1000                          | Natural compound, Sigma-Aldrich                      |
| kakuol                                                                | 1000                          | Natural compound, Isolated in my lab.                |
| 3-phenyl-1-(piperidin-1-yl)-2-en-1-one                                | 1000                          | Synthetic compounds                                  |
| 3-(benzo-1,3-dioxol-5-yl)-1-(piperidin-1-yl)prop-2-en-1-one           | 1000                          | Synthetic compounds                                  |
| 1-(4-methylpiperidin-1-yl)-3-phenylprop-2-en-1-one                    | 1000                          | Synthetic compounds                                  |
| 3-(benzo-1,3-dioxol-5-yl)-1-(4-methylpiperidin-1-yl)prop-2-en-1-one   | 1000                          | Synthetic compounds                                  |
| 1-(3-methylpiperidin-1-yl)-3-phenylprop-2-en-1-one                    | 1000                          | Synthetic compounds                                  |
| 3-(benzo-1,3-dioxol-5-yl)-1-(3-methylpiperidin-1-yl)prop-2-en-1-one   | 1000                          | Synthetic compounds                                  |
| 1-(2-methylpiperidin-1-yl)-3-phenylprop-2-en-1-one                    | 1000, 100, 10, 1              | Synthetic compounds                                  |
| 3-(benzo-1,3-dioxol-5-yl)-1-(2-methylpiperidin-1-yl)prop-2-en-1-one   | 1000, 100, 10                 | Synthetic compounds                                  |
| 1-(2,6-dimethylpiperidin-1-yl)-3-phenylprop-2-en-1-one                | 1000                          | Synthetic compounds                                  |
| 3-(benzo-1,3-dioxol-5-yl)-1-(2,6-methylpiperidin-1-yl)prop-2-en-1-one | 1000                          | Synthetic compounds                                  |
